# Supplementary material for: Ruthenium and palladium bimetallic nanoparticles achieving functional parity with a rhodium cocatalyst for TiO2-photocatalyzed ring hydrogenation of benzoic acid
Source: Royal Society of Chemistry journal article supplement (doi:10.1039/d3cp01379k), 2023-01-01
Supplement: d3cp01379k1.pdf [file d3cp01379k1.pdf]

Supporting information

# Ruthenium and palladium bimetallic nanoparticles achieving functional parity with a rhodium cocatalyst for TiO<sub>2</sub>-photocatalyzed ring hydrogenation of benzoic acid

*Kousuke Nakanishi,<sup>a</sup> Sakae Araki,<sup>a</sup> Kousuke Nomoto,<sup>a</sup> Yuichi Onoue,<sup>a</sup> Ryosuke Yagi,<sup>a</sup> Hiroyuki Asakura,<sup>b</sup> Atsuhiko Tanaka,<sup>b</sup> Tsunehiro Tanaka<sup>c</sup> and Hiroshi Kominami<sup>\*b</sup>*

<sup>a</sup> Department of Molecular and Material Engineering, Graduate School of Science and Engineering, Kindai University, Kowakae, Higashiosaka, Osaka 577-8502, Japan

<sup>b</sup> Department of Applied Chemistry, Faculty of Science and Engineering, Kindai University, Kowakae, Higashiosaka, Osaka 577-8502, Japan

<sup>c</sup> Department of Molecular Engineering, Graduate School of Engineering, Kyoto University, Kyotodaigaku Katsura, Nishikyo-ku, Kyoto 615-8510, Japan

## Table of Contents

Supplementary Figures

**Figure S1.** Fourier transforms of EXAFS spectra of Ru(X)-Pd(Y)/TiO<sub>2</sub> prepared by a one-step PD method, Pd foil, PdO, Ru metal powder and RuO<sub>2</sub> at the (a) Pd K-edge and (b) Ru K-edge. (k-range = 3-12 Å<sup>-1</sup>)

**Figure S2.** Re-used experiments of photocatalytic hydrogenation of BA to CCA over Ru(1.0)-Pd(2.0)/TiO<sub>2</sub> (100 mg) in the presence of OA (1200 μmol) for 6 h.

## Supplementary Figures

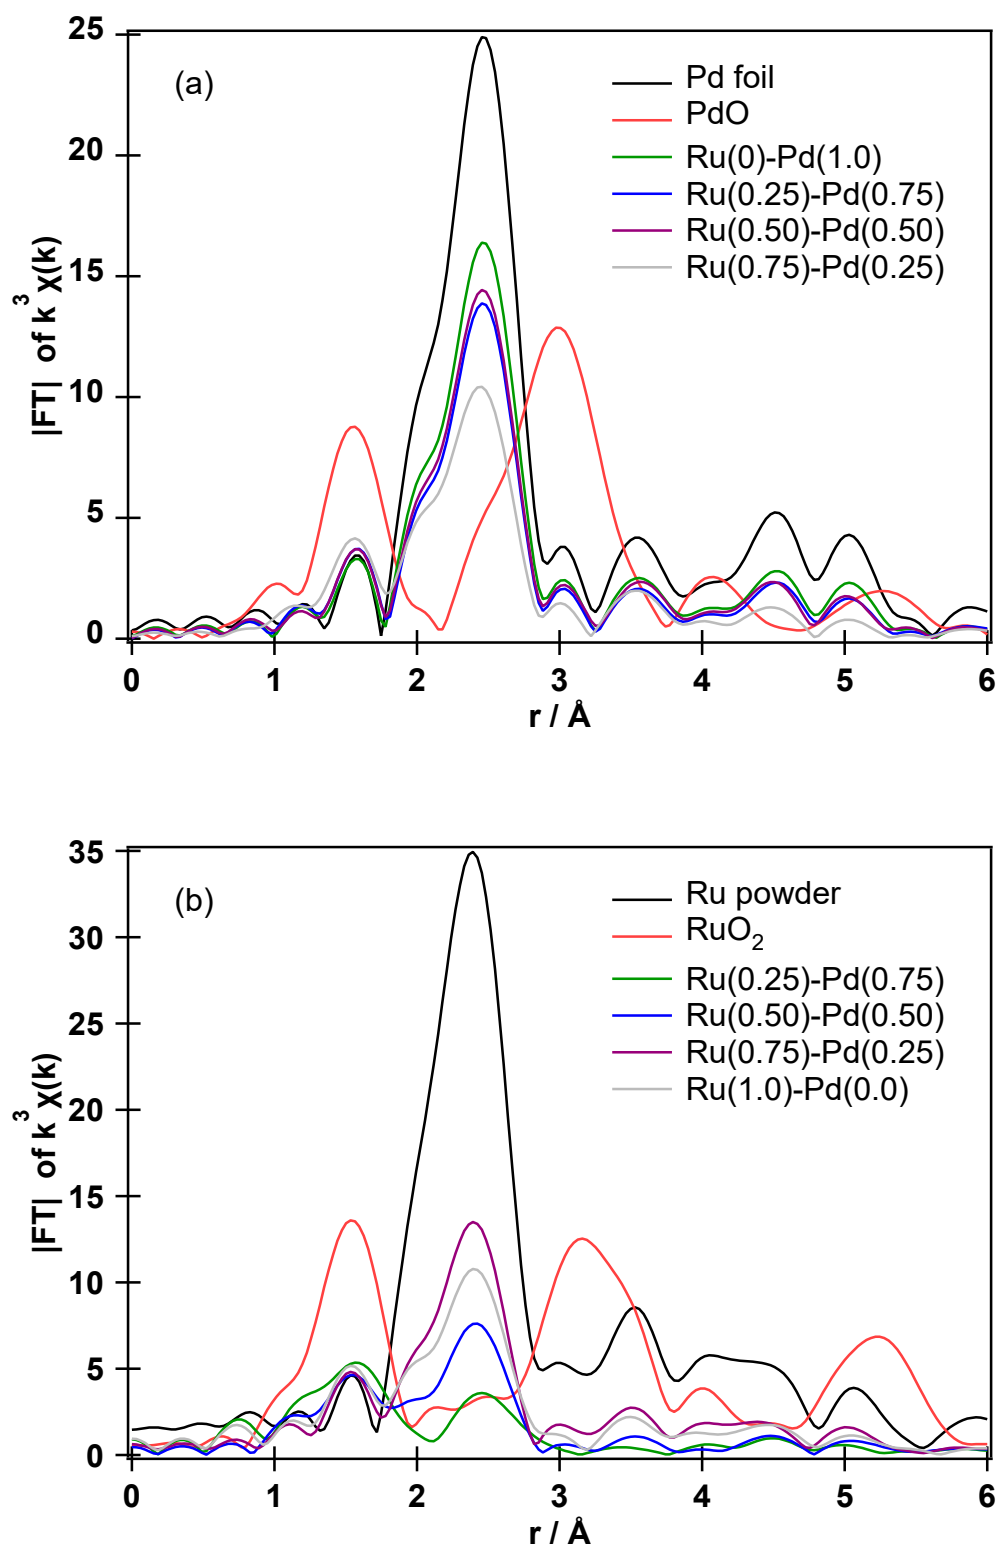

**Figure S1.** Fourier transforms of EXAFS spectra of Ru(X)-Pd(Y)/TiO<sub>2</sub> prepared by a one-step PD method, Pd foil, PdO, Ru metal powder and RuO<sub>2</sub> at the (a) Pd K-edge and (b) Ru K-edge. ( $k$ -range = 3-12  $\text{\AA}^{-1}$ )

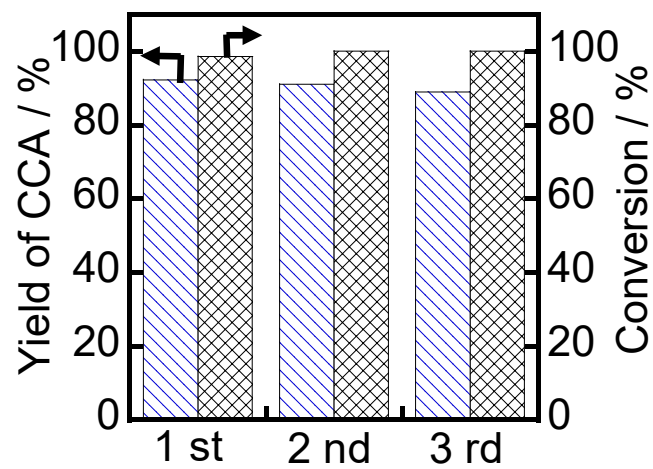

**Figure S2.** Re-used experiments of photocatalytic hydrogenation of BA to CCA over Ru(1.0)-Pd(2.0)/TiO<sub>2</sub> (100 mg) in the presence of OA (1200 μmol) for 6 h.
